# Supplementary material
Source: publisher figshare collection journal article supplement (https://acs.figshare.com/ndownloader/files/11108000)
Supplement: Supplementary file 1 [file 11108000]

## **SUPPORTING INFORMATION**

### **A Gas Transport Model in Dual-Porosity Shale Rocks with Fractal Structures**

<sup>1</sup>Jinze Xu, <sup>1\*</sup>Keliu Wu, <sup>2</sup>Zhandong Li, <sup>3</sup>Yi Pan, <sup>1</sup>Ran Li, <sup>1</sup>Jing Li, <sup>1</sup>Zhangxin Chen

<sup>1</sup>Department of Chemical and Petroleum Engineering, University of Calgary, Calgary, Alberta, Canada T2N 1N4

<sup>2</sup>College of Petroleum Engineering Institute, Northeast Petroleum University, Daqing, Heilongjiang, China 163318

<sup>3</sup>College of Petroleum Engineering, Liaoning Shihua University, Fushun, Liaoning, China 113001

\*Email: wukeliu19850109@163.com

Tel: +1-(403)966-3673

## Calculation of Gas Properties

In SRK EOS, molar volume of real gas is calculated based on Equations (S1)-(S6) <sup>1,2</sup>:

$$V_m = -\frac{1}{3P} \left( B + \frac{3P(\chi^2 P + \chi RT - \alpha\kappa) + R^2 T^2}{B} - RT \right) \quad (S1)$$

$$B = \sqrt[3]{\frac{g + \sqrt{g^2 - 4[3P(\chi^2 P + \chi RT - \alpha\kappa) + R^2 T^2]^3}}{2}} \quad (S2)$$

$$g = -2R^3 T^3 - 27\alpha\kappa\chi P^2 - 9RPT(\chi^2 P + \chi RT - \alpha\kappa) \quad (S3)$$

$$\alpha = [1 + (0.48508 + 1.55171\omega - 0.15613\omega^2)(1 - \sqrt{T_r})]^2 \quad (S4)$$

$$\kappa = 0.42748 \frac{R^2 T_c^2}{P_c} \quad (S5)$$

$$\chi = 0.08664 \frac{RT_c}{P_c} \quad (S6)$$

Density of molecular number can be calculated by (S7) <sup>1,2</sup>:

$$n = \frac{N_A}{V_m} \quad (S7)$$

Mean molecular speed is obtained based on Equation (S8) <sup>1,2</sup>:

$$\bar{v} = 2 \sqrt{\frac{2RT}{\pi M}} \quad (S8)$$

Knudsen number can be expressed by Equation (S9) <sup>1,2</sup>:

$$Kn = \frac{\lambda}{d_h} \quad (S9)$$

Mean free path is calculated as Equation (S10) <sup>1,2</sup>:

$$\lambda = \frac{1}{\pi n d_m^2} \quad (S10)$$

Gas density is shown as Equation (S11) <sup>1,2</sup>:

$$\rho = \frac{Mn}{N_A} \quad (S11)$$

The viscosity is dependent as pressure and temperature, which is shown by Equation (S12)<sup>3</sup>:

$$\mu = \mu_0 \left[ 1 + \frac{o_1}{T_r^{1.5}} \left( \frac{P_r^4}{T_r^{20} + P_r^4} \right) + o_2 \left( \frac{P_r}{T_r} \right)^2 + o_3 \left( \frac{P_r}{T_r} \right) \right] \quad (S12)$$

The compressibility factor is based on Equation (S13)<sup>1,2</sup>:

$$Z = \frac{P}{nkT} \quad (S13)$$

Equation (S14) is the expression of gas coverage<sup>4</sup>:

$$\theta = \frac{P/Z}{P/Z+P_L} \quad (\text{S14})$$

We can also obtain surface diffusion coefficient as follows<sup>5</sup>:

$$\mathfrak{D}_s = 8.29 \times 10^{-7} T^{0.5} \exp\left(-\frac{\Delta H^{0.8}}{RT}\right) \frac{2(1-\theta)+\Psi\theta(2-\theta)+[H(1-\Psi)](1-\Psi)\Psi\theta^2}{2(1-\theta+\frac{\Psi}{2})^2} \quad (\text{S15})$$

## References

- (1) Xu, J.; Wu, K.; Yang, S.; Cao, J.; Chen, Z.; Pan, Y.; Yan, B. Real Gas Transport in Tapered Noncircular Nanopores of Shale Rocks. *AIChE J.* **2017**, *63*, 3224-3242.
- (2) Xu, J.; Wu, K.; Li, R.; Li, Z.; Li, J.; Xu, Q.; Chen Z. Real Gas Transport in Shale Matrix with Fractal Structures. *Fuel* **2018**, *219(1)*, 353-63.
- (3) Jarrahan, A.; Heidaryan, E. A Simple Correlation to Estimate Natural Gas Viscosity. *J. Nat. Gas Sci. Eng.* **2014**, *20*, 50–57.
- (4) Wu, K.; Li, X.; Wang, C.; Yu, W.; Chen, Z. Model for Surface Diffusion of Adsorbed Gas in Nanopores of Shale Gas Reservoirs. *Ind. Eng. Chem. Res.* **2015**, *54*, 3225-3236.
- (5) Civan, F.; Devegowda, D. Rigorous Modeling for Data Analysis towards Accurate Determination of Shale Gas-permeability by Multiple-repeated Pressure-pulse Transmission Tests on Crushed Samples. Presented at the SPE annual technical conference and exhibition, Amsterdam, October 2014; Paper SPE-170659-MS.
